# Supplementary material
Source: PubMed Central journal article supplement (PMC3476539)
Supplement: supp_blood-2012-04-421057_blood-2012-04-421057-1.pdf [file supp_blood-2012-04-421057_blood-2012-04-421057-1.pdf]

**Supplemental Table 1: Comparison of patient characteristics in this study and the main clinical trial cohort.**

|                            | E2496 clinical trial cohort |         | Patients used in this study |         | p value |
|----------------------------|-----------------------------|---------|-----------------------------|---------|---------|
|                            | n                           | %       | n                           | %       |         |
| <b>Total</b>               | 794                         |         | 287                         |         |         |
| <b>Age</b>                 |                             |         |                             |         |         |
| Median, range              | 33                          | 16 - 83 | 32                          | 18 - 79 | 0.65    |
| <b>Sex</b>                 |                             |         |                             |         |         |
| Male                       | 425                         | 54      | 161                         | 56      | 0.28    |
| Female                     | 369                         | 46      | 126                         | 44      |         |
| <b>Performance status*</b> |                             |         |                             |         |         |
| 0                          | 448                         | 56      | 172                         | 60      | 0.21    |
| 1                          | 313                         | 39      | 110                         | 38      |         |
| 2                          | 23                          | 3       | 5                           | 2       |         |
| Unknown                    | 10                          | 1       | 0                           | 0       |         |
| <b>Disease stage*</b>      |                             |         |                             |         |         |
| I                          | 32                          | 4       | 6                           | 2       | 0.15    |
| II                         | 209                         | 26      | 72                          | 25      |         |
| Ile                        | 40                          | 5       | 15                          | 5       |         |
| III                        | 269                         | 34      | 112                         | 39      |         |
| IIle                       | 32                          | 4       | 11                          | 4       |         |
| IV                         | 203                         | 26      | 71                          | 25      |         |
| Unknown                    | 9                           | 1       | 0                           | 0       |         |
| <b>Histologic subtype*</b> |                             |         |                             |         |         |
| Nodular sclerosis          | 562                         | 71      | 223                         | 78      | 0.53    |
| Mixed cellularity          | 87                          | 11      | 38                          | 13      |         |
| Lymphocyte rich            | 14                          | 2       | 8                           | 3       |         |
| Lymphocyte depleted        | 2                           | 0       | 1                           | 0       |         |
| Unclassified               | 100                         | 13      | 17                          | 6       |         |
| Unknown                    | 29                          | 4       | 0                           | 0       |         |
| <b>IPS *</b>               |                             |         |                             |         |         |
| 0                          | 60                          | 8       | 20                          | 7       | 0.37    |
| 1                          | 192                         | 24      | 72                          | 25      |         |
| 2                          | 260                         | 33      | 98                          | 34      |         |
| 3                          | 151                         | 19      | 58                          | 20      |         |
| 4                          | 71                          | 9       | 25                          | 9       |         |
| 5                          | 39                          | 5       | 8                           | 3       |         |
| 6                          | 9                           | 1       | 5                           | 2       |         |
| Unknown                    | 12                          | 2       | 1                           | 0       |         |
| <b>Primary treatment</b>   |                             |         |                             |         |         |
| ABVD                       | 395                         | 50      | 144                         | 50      | 0.92    |
| Stanford V                 | 399                         | 50      | 143                         | 50      |         |
| <b>Outcomes</b>            |                             |         |                             |         |         |
| Median follow-up           |                             | 5.3     |                             | 5.5     |         |
| FFS (5 year)               |                             | 72%     |                             | 73%     | 0.90    |

|                       |     |     |      |
|-----------------------|-----|-----|------|
| OS (5 year)           | 88% | 90% | 0.78 |
| Total deaths observed | 97  | 32  |      |

*p* values are for comparing patients used in this study (n=287) with those that were not in this study (n=507) in the E2496 clinical trial cohort (n=794).

\*Pearson chi-squared test was performed with unknown and/or unclassified cases excluded.

**Supplemental Table 2: Comparison of patient characteristics and EBER status.**

|                                                  | EBER <sup>pos</sup> |    | EBER <sup>neg</sup> |    | <i>p</i> value |
|--------------------------------------------------|---------------------|----|---------------------|----|----------------|
|                                                  | n                   | %  | n                   | %  |                |
| <b>Total</b>                                     | 49                  |    | 238                 |    |                |
| <b>Age (≥45y)</b>                                |                     |    |                     |    |                |
| No                                               | 35                  | 71 | 205                 | 86 | 0.01           |
| Yes                                              | 14                  | 29 | 33                  | 14 |                |
| <b>Sex</b>                                       |                     |    |                     |    |                |
| Female                                           | 35                  | 71 | 112                 | 47 | 0.02           |
| Male                                             | 14                  | 29 | 126                 | 53 |                |
| <b>Stage IV disease</b>                          |                     |    |                     |    |                |
| No                                               | 35                  | 71 | 181                 | 76 | 0.50           |
| Yes                                              | 14                  | 29 | 57                  | 24 |                |
| <b>Albumin (&lt;4g/dl)*</b>                      |                     |    |                     |    |                |
| No                                               | 14                  | 29 | 73                  | 31 | 0.81           |
| Yes                                              | 33                  | 67 | 158                 | 66 |                |
| Unknown                                          | 2                   | 4  | 7                   | 3  |                |
| <b>Hemoglobin (&lt;10.5g/dl)*</b>                |                     |    |                     |    |                |
| No                                               | 35                  | 71 | 191                 | 80 | 0.14           |
| Yes                                              | 11                  | 22 | 34                  | 14 |                |
| Unknown                                          | 3                   | 6  | 13                  | 5  |                |
| <b>WBC count (≥15,000/mm3)*</b>                  |                     |    |                     |    |                |
| No                                               | 44                  | 90 | 182                 | 76 | 0.02           |
| Yes                                              | 2                   | 4  | 39                  | 16 |                |
| Unknown                                          | 3                   | 6  | 17                  | 7  |                |
| <b>Lymphocyte count (&lt;600/mm3 or &lt;8%)*</b> |                     |    |                     |    |                |
| No                                               | 45                  | 92 | 206                 | 87 | 0.41           |
| Yes                                              | 2                   | 4  | 17                  | 7  |                |
| Unknown                                          | 2                   | 4  | 15                  | 6  |                |
| <b>IPS (≥3)*</b>                                 |                     |    |                     |    |                |
| No                                               | 26                  | 53 | 163                 | 68 | 0.03           |
| Yes                                              | 23                  | 47 | 74                  | 31 |                |
| Unknown                                          | 0                   | 0  | 1                   | 0  |                |
| <b>Histological subtype*</b>                     |                     |    |                     |    |                |
| Nodular sclerosis                                | 26                  | 53 | 197                 | 83 | <0.01          |
| Mixed cellularity                                | 19                  | 39 | 19                  | 8  |                |
| Lymphocyte rich                                  | 2                   | 4  | 6                   | 3  |                |
| Lymphocyte depleted                              | 1                   | 2  | 0                   | 0  |                |
| Unclassified                                     | 1                   | 2  | 16                  | 7  |                |
| <b>Treatment received</b>                        |                     |    |                     |    |                |
| ABVD                                             | 28                  | 57 | 116                 | 49 | 0.28           |
| Stanford V                                       | 21                  | 43 | 122                 | 51 |                |
| <b>CD68</b>                                      |                     |    |                     |    |                |
| CD68 <sup>low</sup>                              | 15                  | 31 | 163                 | 68 | <0.01          |

|              |                       |    |    |     |    |                 |
|--------------|-----------------------|----|----|-----|----|-----------------|
| <b>CD163</b> | CD68 <sup>high</sup>  | 34 | 69 | 75  | 32 |                 |
|              | CD163 <sup>low</sup>  | 20 | 41 | 148 | 62 | <i>&lt;0.01</i> |
|              | CD163 <sup>high</sup> | 29 | 59 | 90  | 38 |                 |

*p* values are for comparing between EBER-positive and negative cases.

\*Pearson chi-squared test was performed with unknown or unclassified cases excluded.

**Supplemental Figure 1. Correlation between Aperio and visual scores for CD68 and CD163 IHC expression.**

a) CD68 Aperio vs. visual scores, b) CD163 Aperio vs. visual scores, c) CD68 vs. CD163 Aperio scores.

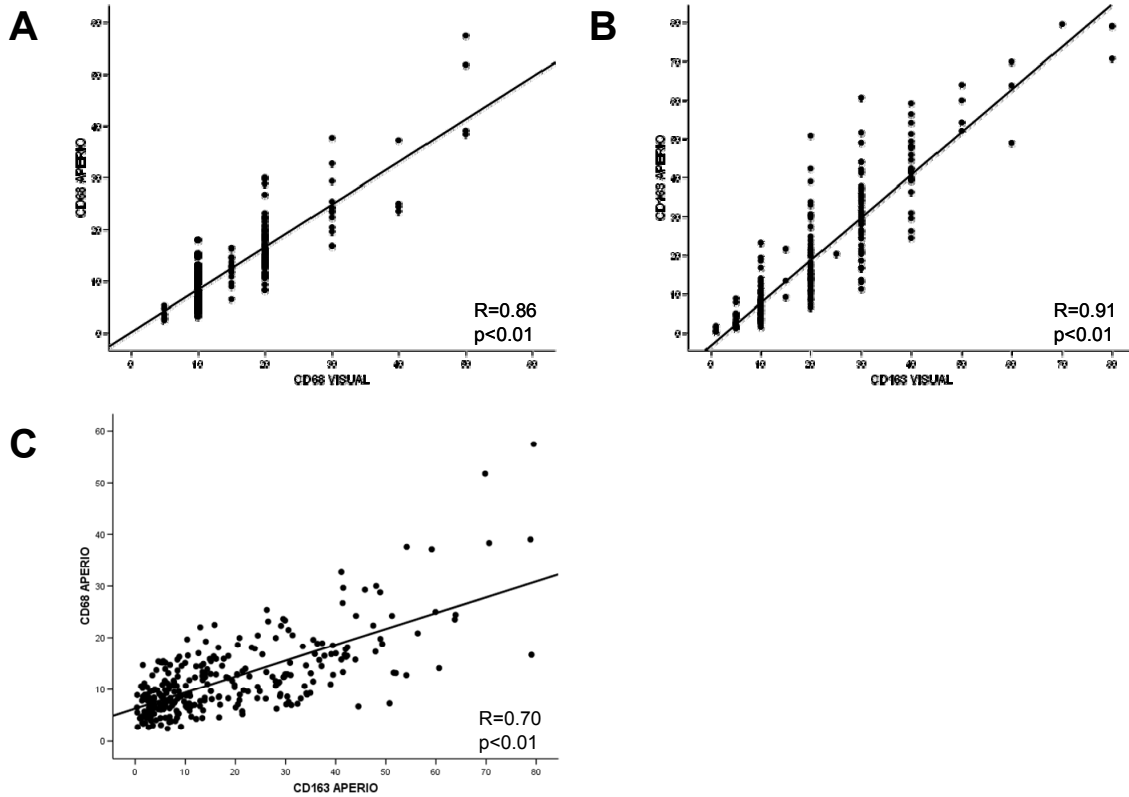

#

Supplemental Figure 2. CD68 and CD163 expression and survival in A) patients treated with ABVD, and B) patients treated with Stanford V chemotherapy.

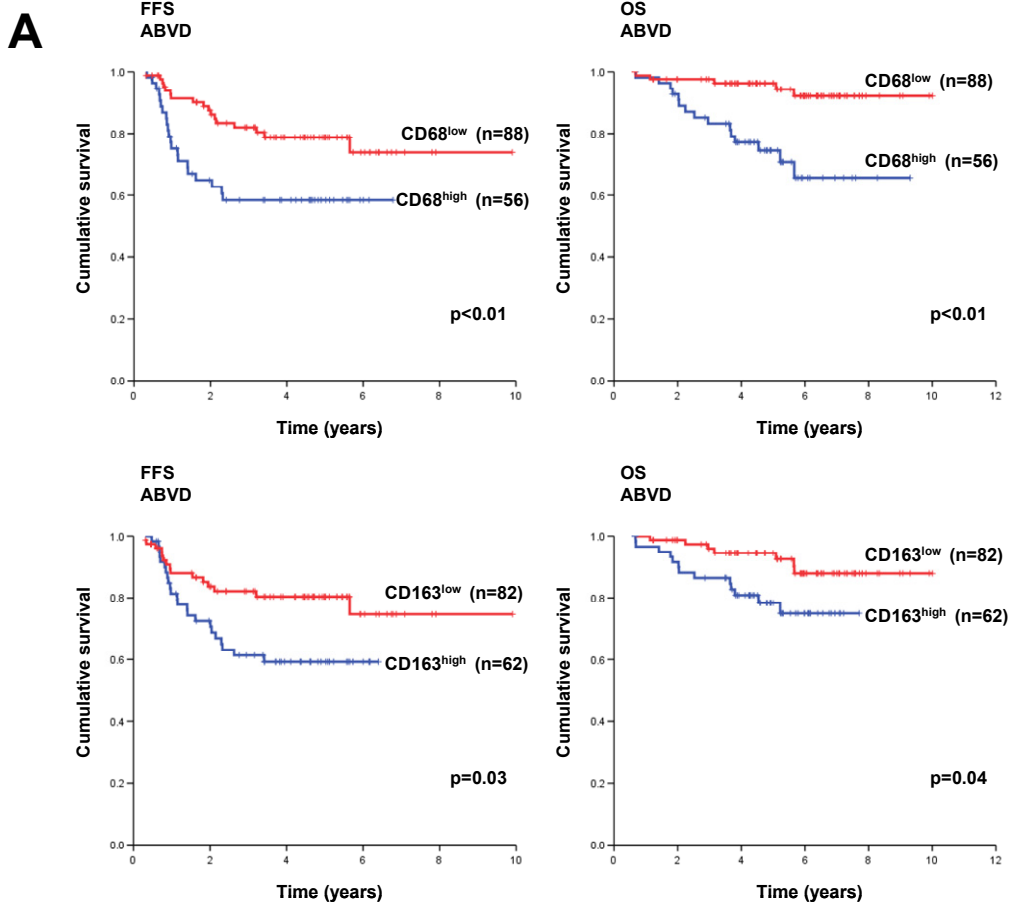

**B**

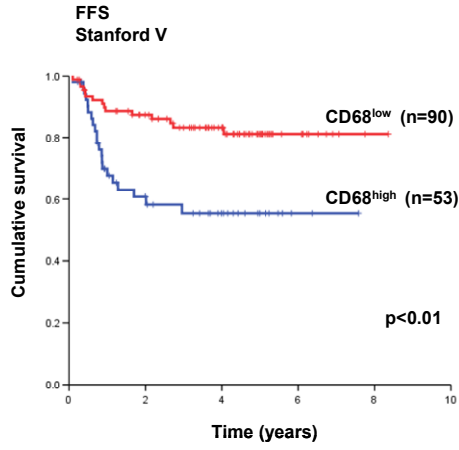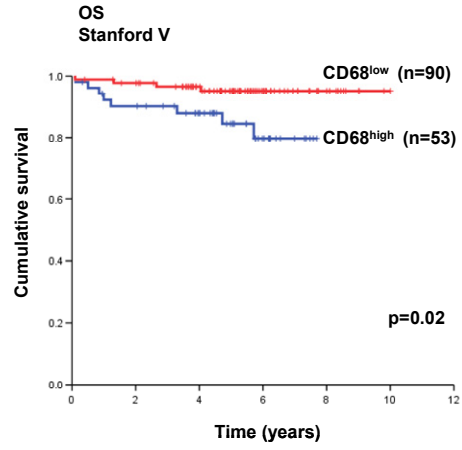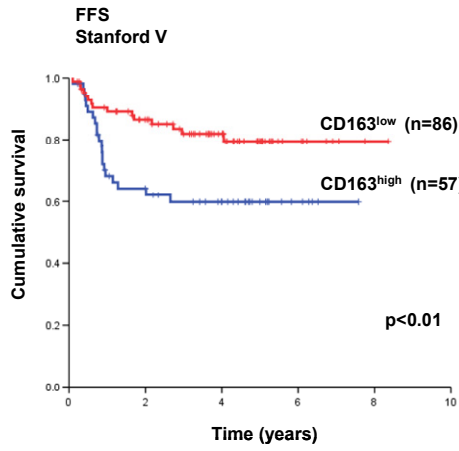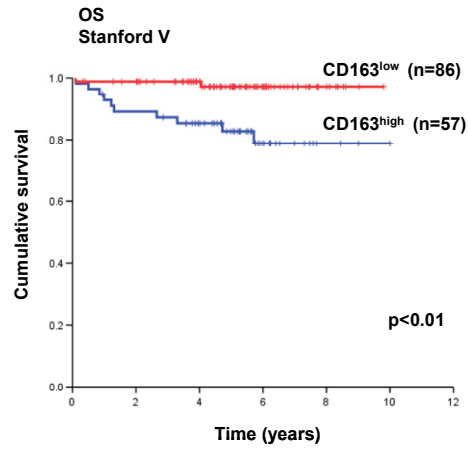

Supplemental Figure 3. EBER status and survival.

A) EBER status and survival. CD68 and CD163 IHC expression and survival

in B) EBER-positive cases, and C) EBER-negative cases.

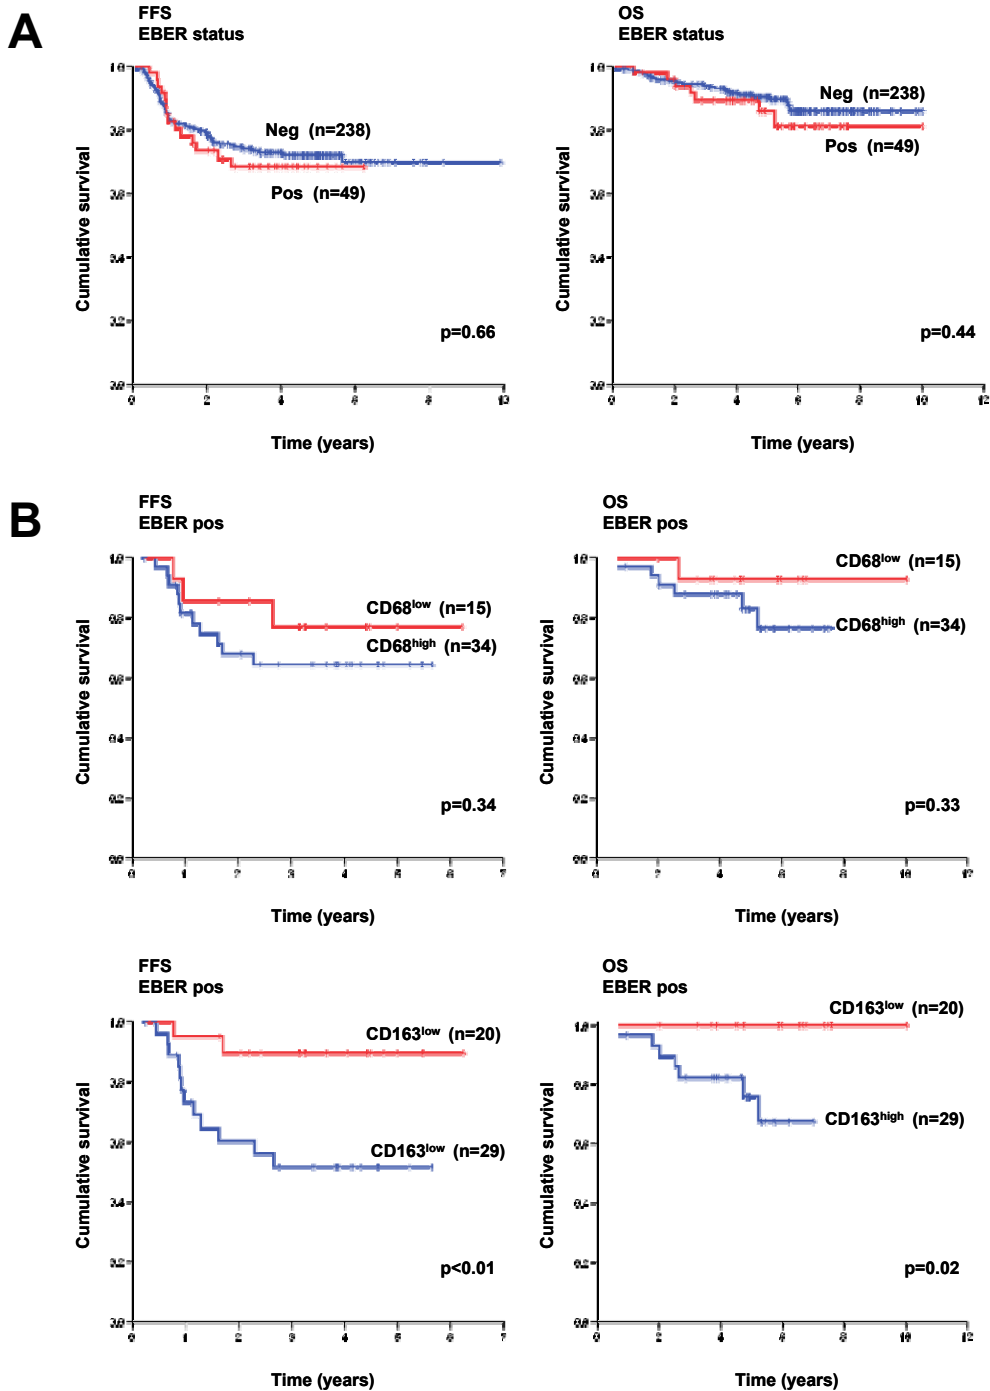



**C**

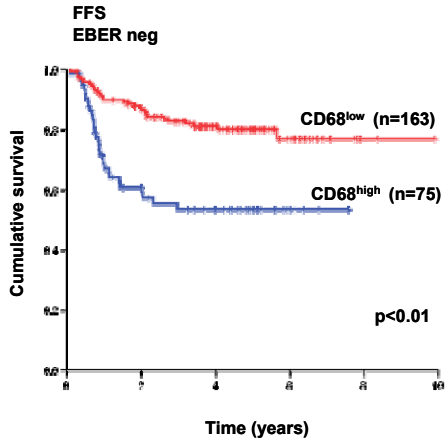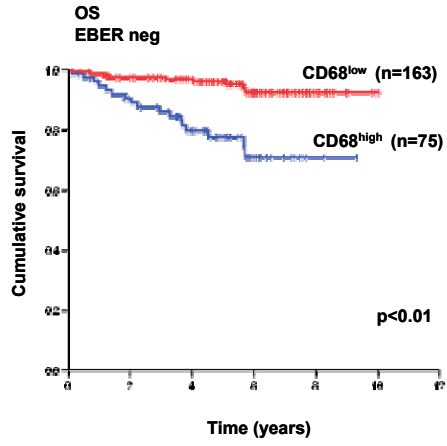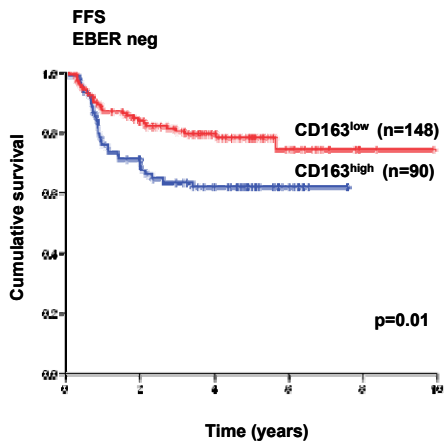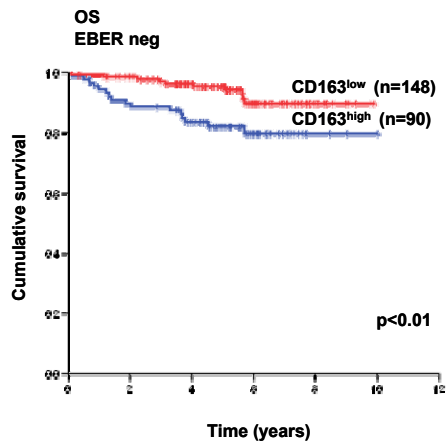

#
